# Supplementary material for: Pre-clinical pharmacokinetic and pharmacodynamic modelling study of 4-hydroxyisoleucine using validated ultra-performance liquid chromatography-tandem mass spectrometry
Source: Royal Society of Chemistry journal article supplement (doi:10.1039/c9ra08121f), 2020-01-01
Supplement: c9ra08121f1.pdf [file c9ra08121f1.pdf]

**Pre-Clinical Pharmacokinetic Pharmacodynamic Modelling study of 4-Hydroxyisoleucine using Validated Ultra Performance Liquid Chromatography-Tandem Mass Spectroscopy**

Geetika Wadhwa<sup>a‡</sup>, Kowthavarapu Venkata Krishna<sup>a‡</sup>, Rajeev Taliyan<sup>a</sup>, Neeraj Tandon<sup>b</sup>, Satyapal Singh Yadav<sup>c</sup>, C K Katiyar<sup>d</sup>, Sunil Kumar Dubey<sup>a\*</sup>

<sup>a</sup>*Department of Pharmacy, Birla Institute of Technology and Science, Pilani (BITS-PILANI), Pilani Campus, Rajasthan-333031, India*

<sup>b</sup>*Divisions of Publications & Information and Medicinal Plants, Indian Council of Medical Research, (Ministry of Health & Family Welfare, Govt. of India) Ansari Nagar, New Delhi-110029, India*

<sup>c</sup>*Medicinal Plants Division, Indian Council of Medical Research, (Ministry of Health & Family Welfare, Govt. of India) Ansari Nagar, New Delhi-110029, India*

<sup>d</sup>*Emami Ltd, 687, Anandpur, EM Bypass, Kolkata-7001107, India*

‡ Equal Contribution

\*Corresponding author

Dr. Sunil Kumar Dubey,

Department of Pharmacy,

Birla Institute of Technology and Science, Pilani, Pilani Campus,

Rajasthan, INDIA – 333031

Mobile no: +91 8239703734

Email: skdubey@pilani.bits-pilani.ac.in

## Supplementary data

**Table S1.:** Optimization of protein precipitation extraction method for sample preparation

| Extracting solvent | Sample volume (μL) | Volume of extraction solvent added (mL) | Vortex time (min) | Centrifugation [speed (g), time (min)] | % Recovery | Remarks                         |
|--------------------|--------------------|-----------------------------------------|-------------------|----------------------------------------|------------|---------------------------------|
| Methanol           | 300                | 3                                       | 2                 | 15000, 10                              | 28-31      | Inconsistent and poor recovery  |
| Acetonitrile       | 300                | 3                                       | 2                 | 15000, 10                              | 40-42      | Consistent recovery was noticed |

**Table S2.:** Optimization parameters of liquid chromatography and mass spectroscopy

| Sr.No.                                                                                                                                                               | Chromatographic condition                        | Parameters                                                           | Remarks                                                                                                                                                        |
|----------------------------------------------------------------------------------------------------------------------------------------------------------------------|--------------------------------------------------|----------------------------------------------------------------------|----------------------------------------------------------------------------------------------------------------------------------------------------------------|
| 1.                                                                                                                                                                   | Mode                                             | ES-<br>ES+                                                           | Low intensity of peak<br>High Intensity of peak                                                                                                                |
| Based on the results, ESI+ mode was selected and used further for optimizing the chromatographic conditions                                                          |                                                  |                                                                      |                                                                                                                                                                |
| 2.                                                                                                                                                                   | Mobile Phase (50: 50)                            | ACN: Water<br>ACN: 0.1% glacial acetic acid<br>ACN: 0.1% formic acid | No proper ionization of analytes which results in decreased peak intensity<br>Splitting in the peaks was observed<br>Symmetrical peak with high peak intensity |
| From these results, it was conformed that the ACN: 0.1% formic acid was used as mobile phase and further optimized                                                   |                                                  |                                                                      |                                                                                                                                                                |
| 3.                                                                                                                                                                   | Mobile phase composition (ACN: 0.1% formic acid) | 40:60<br>30: 70<br>20:80                                             | Retention time was more than 2 min<br>Peak splitting was noticed<br>Symmetric peaks of analyte and IS was observed with proper resolution                      |
| Based on the results, it was concluded that ACN:0.1% formic acid with 20:80 was used as the mobile phase for further method development and validation of parameters |                                                  |                                                                      |                                                                                                                                                                |

**Table S3.:** Intellistart MRM Optimization of analytes

| Compound Name        | Formula                                        | Parent m/z | Cone voltage | Daughters | Collision energy | Ion mode |
|----------------------|------------------------------------------------|------------|--------------|-----------|------------------|----------|
| 4-Hydroxy isoleucine | C <sub>6</sub> H <sub>13</sub> NO <sub>3</sub> | 148.19     | 24           | 74.02     | 12               | ES+      |
|                      |                                                |            | 24           | 102.13    | 10               | ES+      |
|                      |                                                |            | 24           | 84.16     | 18               | ES+      |
|                      |                                                |            | 24           | 95.88     | 14               | ES+      |
| L-isoleucine         | C <sub>6</sub> H <sub>13</sub> NO <sub>2</sub> | 132.17     | 24           | 86.19     | 12               | ES+      |
|                      |                                                |            | 24           | 44.08     | 18               | ES+      |
|                      |                                                |            | 24           | 69.04     | 20               | ES+      |
|                      |                                                |            | 24           | 41.08     | 24               | ES+      |

**Table S4.:** Regression parameters of the calibration curve generated for each weighting factor.

| Wi               | b        | a        | r <sup>2</sup> |
|------------------|----------|----------|----------------|
| unweighted       | 9.65e-06 | 6.82E-04 | 0.9993         |
| 1/var            | 1.02e-05 | 6.86E-04 | 0.9990         |
| 1/x <sup>2</sup> | 1.02e-05 | 6.49E-04 | 0.9991         |
| 1/x              | 1.02e-05 | 6.17E-04 | 0.9988         |
| 1/y <sup>2</sup> | 1.05e-05 | 6.25E-04 | 0.9966         |
| 1/y              | 1.03e-05 | 6.16E-04 | 0.9291         |

Wi, weighing factor; b, slope; a, constant; r<sup>2</sup>, regression co-efficient

Based on the above results, 1/x<sup>2</sup> was selected for further analysis based on the regression co-efficient value.<sup>1</sup>

#### Reference

- 1 H. Gu, G. Liu, J. Wang, A.-F. Aubry and M. E. Arnold, *Anal. Chem.*, 2014, **86**, 8959–8966.

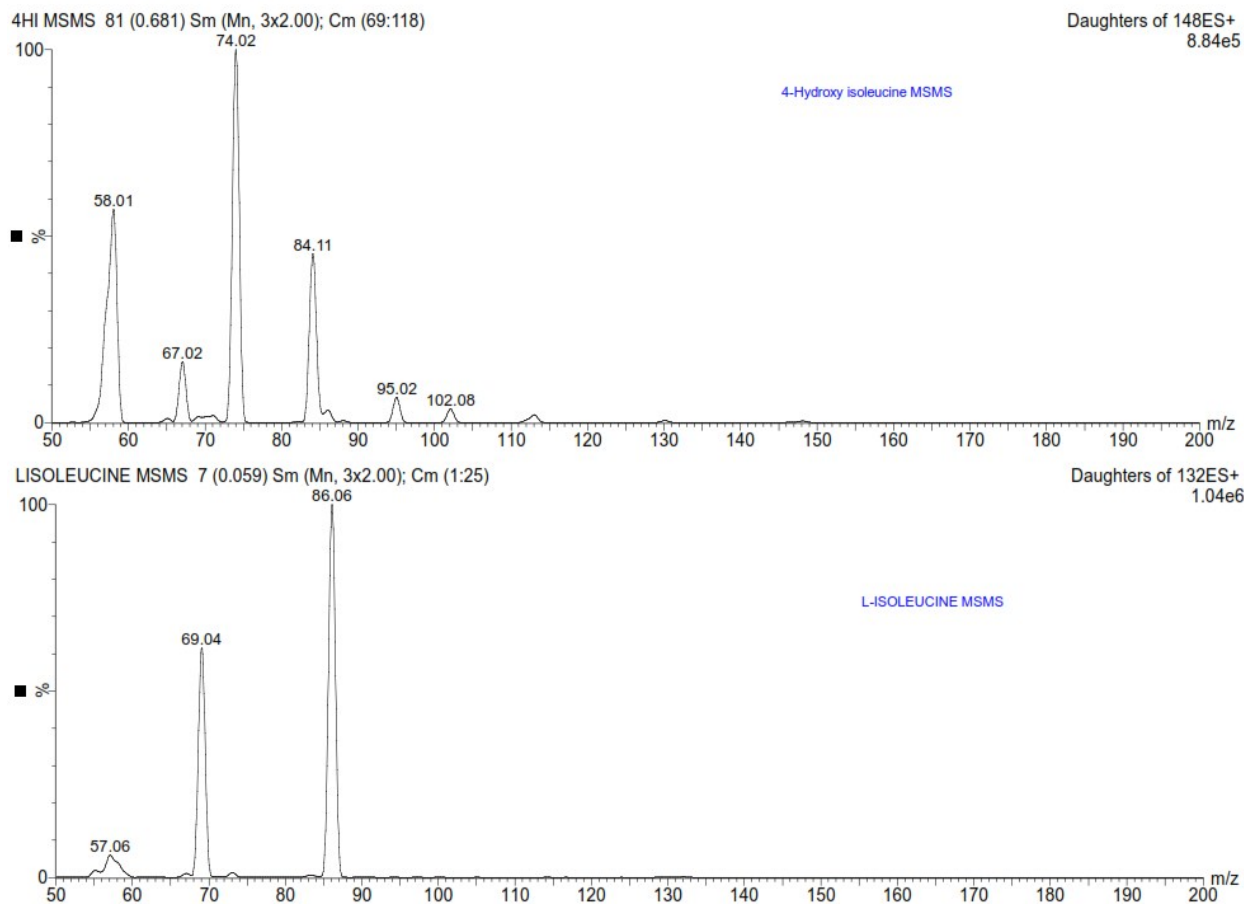

Fig S1.: Splitting pattern for 4-hydroxy isoleucine and l-isoleucine

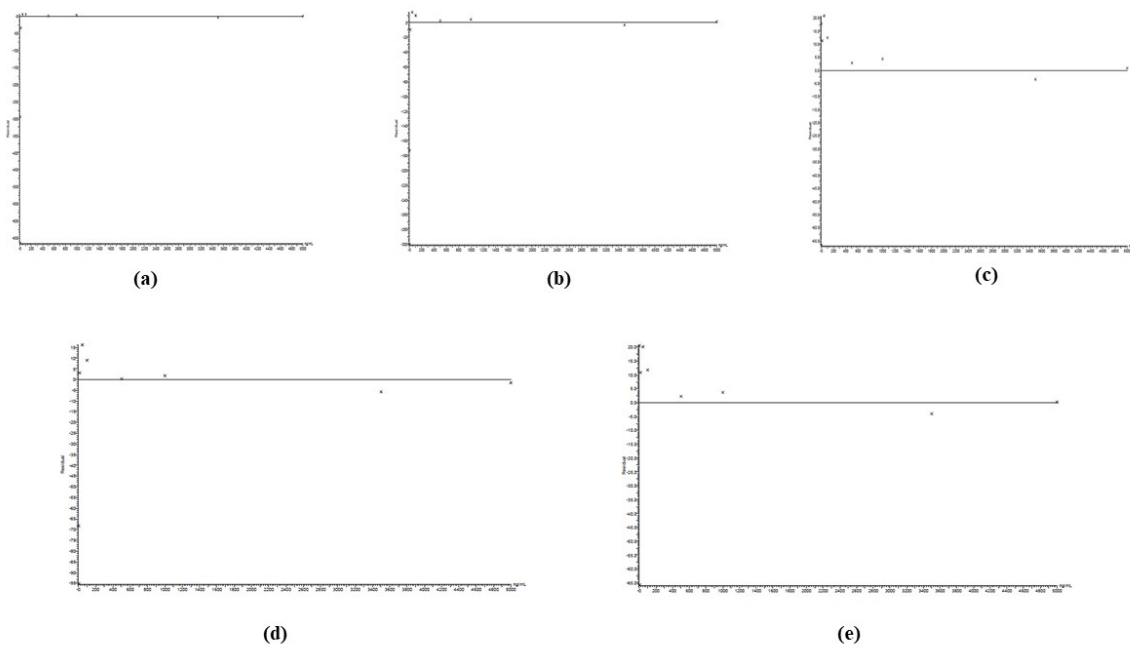

**Fig S2.:** Statistical residuals plotted against concentrations (ng/mL) (a) 1/variance; (b) 1/x<sup>2</sup>; (c) 1/x; (d) 1/y<sup>2</sup>; (e) 1/y
